# Supplementary material
Source: MDPI journal article supplement (https://www.mdpi.com/2071-1050/15/18/13406)
Supplement: s1 [file s1 › sustainability-2520548-supplementary.pdf]

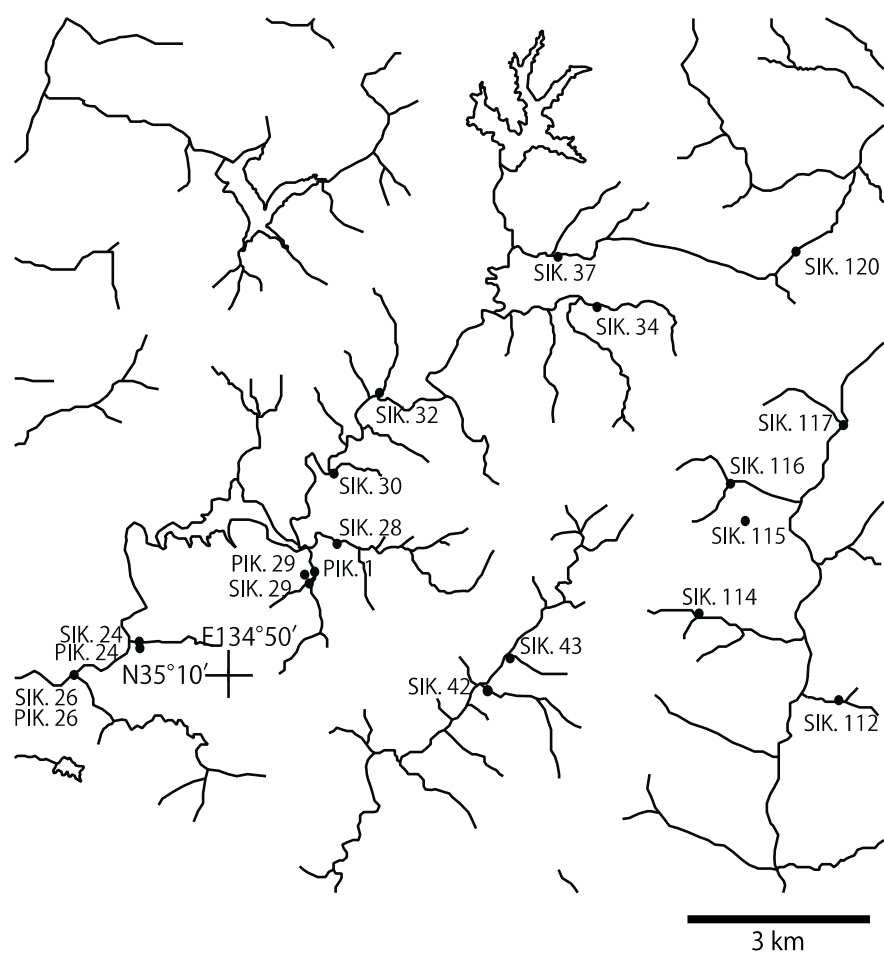

**Figure S1.** Ikuno mine sampling location. SIK: Sediment sample, PIK: Plant sample.

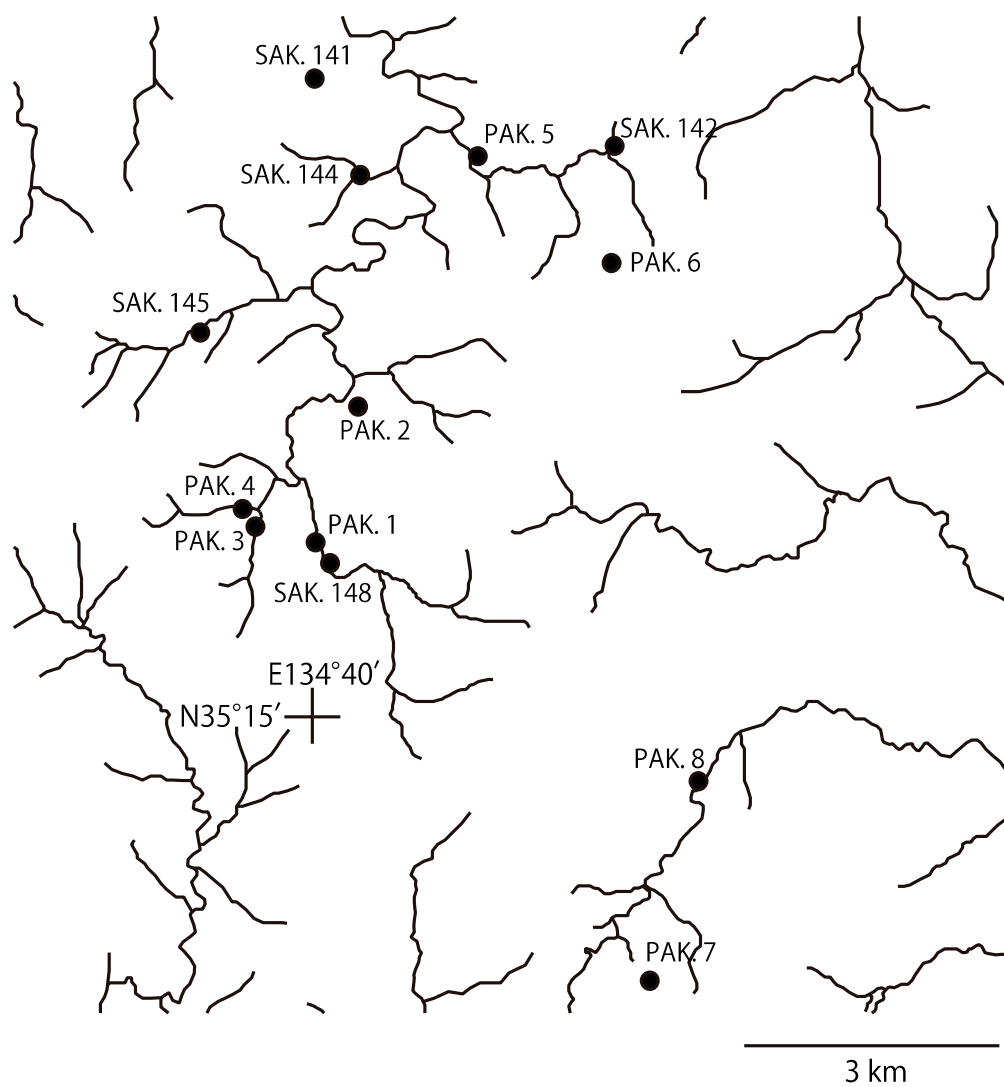

**Figure S2.** Akenobe mine sampling location. SAK: Sediment sample, PAK: Plant sample.

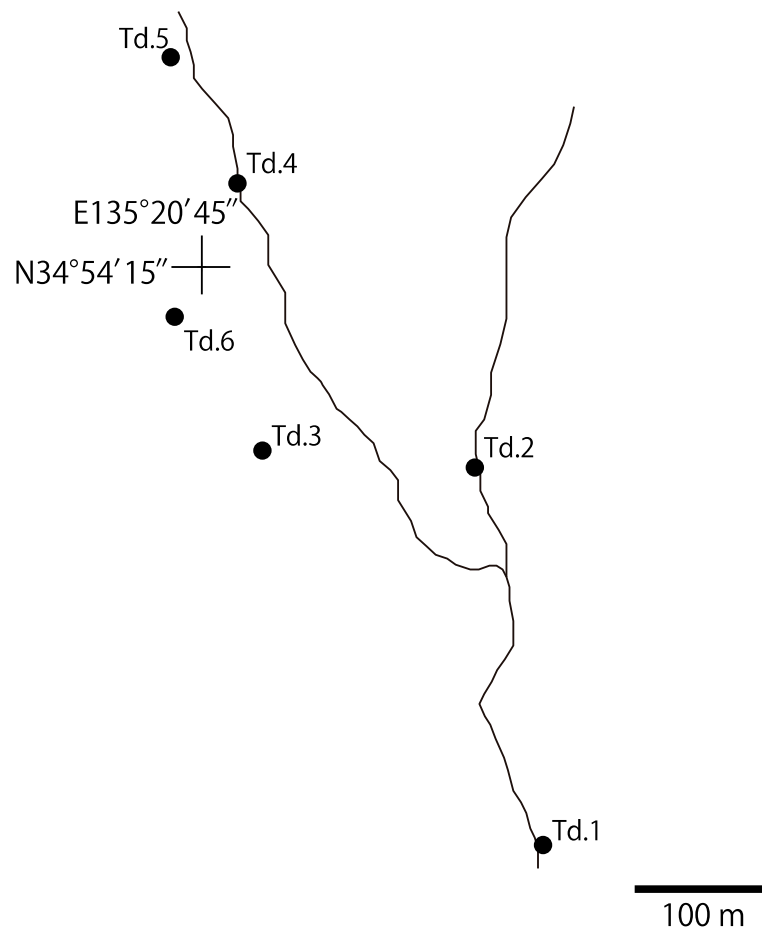

**Figure S3.** Tada mine sampling location.
